# Supplementary material for: Predicting the phytotoxic mechanism of action of LiCoO2 nanomaterials using a novel multiplexed algal cytological imaging (MACI) assay and machine learning
Source: Royal Society of Chemistry journal article supplement (doi:10.1039/d3en00629h), 2024-01-01
Supplement: d3en00629h1.pdf [file d3en00629h1.pdf]

**Supporting information for:**

**Predicting the phytotoxic mechanism of action of LiCoO<sub>2</sub> nanomaterials using a novel multiplexed algal cytological imaging (MACI) assay and machine learning**

**Authors:** Eric Ostovich<sup>1</sup>, Austin Henke<sup>2</sup>, Curtis Green<sup>2</sup>, Robert Hamers<sup>2</sup>, Rebecca Klaper<sup>1\*</sup>

<sup>1</sup>School of Freshwater Sciences, University of Wisconsin-Milwaukee, Milwaukee, Wisconsin, USA

<sup>2</sup>Department of Chemistry, University of Wisconsin-Madison, 1101 University Ave., Madison, WI 53706

**Pages: 1**

**Tables: 1**

**Figures: 1**

**Supplementary Table S1:** DLS Data for LCO Suspended in OECD 201 Medium

| [LCO]                      | Z-Average (d.nm)     | $\zeta$ -Potential (mV) | Electrophoretic Mobility ( $\mu\text{m cm Vs}^{-1}$ ) |
|----------------------------|----------------------|-------------------------|-------------------------------------------------------|
| $0.01 \mu\text{g mL}^{-1}$ | $271.47 \pm 22.53$   | $-8.17 \pm 1.79$        | $-0.64 \pm 0.14$                                      |
| $0.1 \mu\text{g mL}^{-1}$  | $844.80 \pm 160.45$  | $-17.23 \pm 1.62$       | $-1.35 \pm 0.13$                                      |
| $1 \mu\text{g mL}^{-1}$    | $629.83 \pm 56.72$   | $-20.30 \pm 1.19$       | $-1.59 \pm 0.09$                                      |
| $10 \mu\text{g mL}^{-1}$   | $1972.67 \pm 445.24$ | $-17.90 \pm 1.01$       | $-1.40 \pm 0.08$                                      |

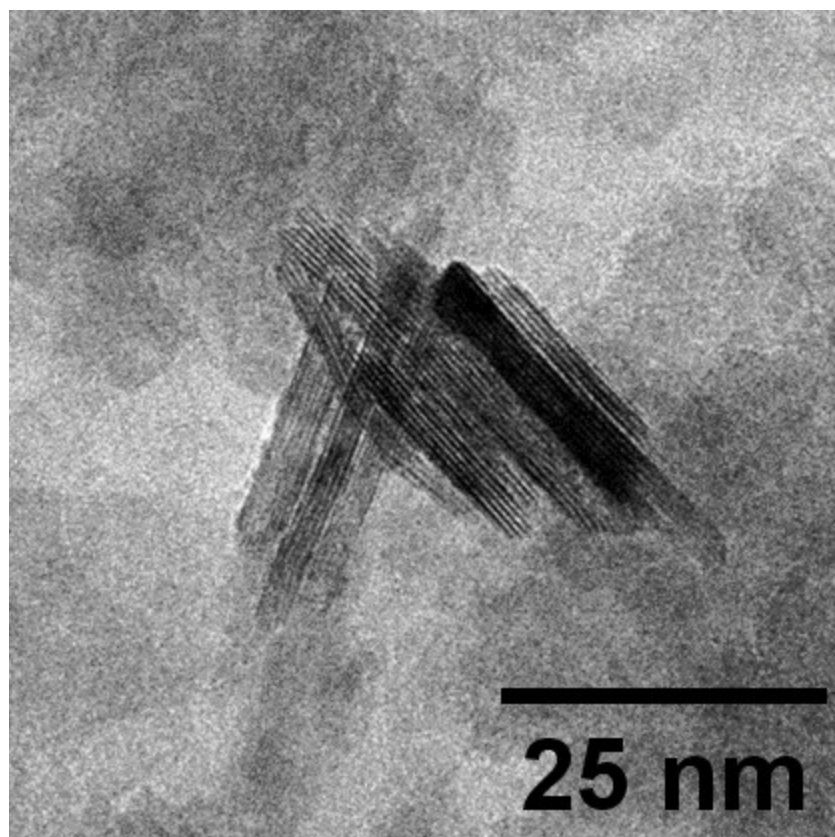

**Supplementary Figure S1:** TEM micrograph of LCO nanoparticles.
